# Supplementary material for: Extensive weight loss reveals distinct gene expression changes in human subcutaneous and visceral adipose tissue
Source: PubMed Central journal article supplement (PMC4593186; doi:10.1038/srep14841), 2015-10-05

# Extensive weight loss reveals distinct gene expression changes in human subcutaneous and visceral adipose tissue

Running title: **Adipose tissue changes after bariatric surgery**

Adil Mardinoglu<sup>1,2,\*</sup>, John T. Heiker<sup>3</sup>, Daniel Gärtner<sup>4</sup>, Elias Bjornson<sup>1</sup>, Michael R. Schön<sup>4</sup>, Gesine Flehmig<sup>3</sup>, Nora Klötting<sup>5</sup>, Knut Krohn<sup>6</sup>, Mathias Fasshauer<sup>3</sup>, Michael Stumvoll<sup>3</sup>, Jens Nielsen<sup>1,2</sup> and Matthias Blüher<sup>3,\*</sup>

<sup>1</sup>Department of Biology and Biological Engineering, Chalmers University of Technology, SE-412 96, Gothenburg, Sweden.

<sup>2</sup>Science for Life Laboratory, KTH - Royal Institute of Technology, SE-171 21, Stockholm, Sweden.

<sup>3</sup>University of Leipzig, Department of Medicine, Leipzig, Germany.

<sup>4</sup>Städtisches Klinikum Karlsruhe, Clinic of Visceral Surgery, Karlsruhe, Germany.

<sup>5</sup>IFB Adiposity Diseases, Junior Research Group 2 “Animal models of obesity”.

<sup>6</sup>Core Unit DNA-Technologies, Interdisziplinäres Zentrum für Klinische Forschung (IZKF) Leipzig, Germany.

\*Corresponding authors

E-mail: [matthias.blueher@medizin.uni-leipzig.de](mailto:matthias.blueher@medizin.uni-leipzig.de)

Tel: +49 341 9713829

Fax: +49 341 9722439

E-mail: [adilm@chalmers.se](mailto:adilm@chalmers.se)

Tel: +46 31 772 3140

Fax: +46 31 772 3801

## **SUPPLEMENTARY FIGURE LEGENDS**

**Figure S1** The enrichment of differentially expressed genes in SAT of obese subjects before the bariatric surgery compared to lean subjects was identified using Gene Ontology Biological Process (GO BP) terms. The most significantly enriched GO BP terms are presented.

**Figure S2** The enrichment of differentially expressed genes in SAT of obese subjects after the bariatric surgery compared to lean subjects was identified using Gene Ontology Biological Process (GO BP) terms. The most significantly enriched GO BP terms are presented.

**Figure S3** The enrichment of differentially expressed genes in VAT of obese subjects before the bariatric surgery compared to lean subjects was identified using Gene Ontology Biological Process (GO BP) terms. The most significantly enriched GO BP terms are presented.

**Figure S4** The enrichment of differentially expressed genes in VAT of obese subjects after the bariatric surgery compared to lean subjects was identified using Gene Ontology Biological Process (GO BP) terms. The most significantly enriched GO BP terms are presented.

**Figure S5** A cellular integrative model of the most significant changes in the expression of metabolic genes in A) VAT and B) SAT of obese subjects after extensive weight loss is presented. Red and blue arrows and indicates the upregulation and downregulation of the associated reactions, respectively. Names of genes with higher expression after significant weight loss are in red, genes with lower expression in blue.

## **SUPPLEMENTARY DATASETS LEGENDS**

**Supplementary Dataset 1** Clinical characteristic of each subjects involved in our study before the sleeve gastrectomy and ~1 year post-surgery (before and after extensive weight loss).

**Supplementary Dataset 2** List of the differentially expressed probe sets in SAT and VAT identified by comparing the expression of the genes before and after the extensive weight loss to the expression of genes in lean subjects.

Before BS-Lean

After BS-Lean

GO BP Terms in SAT

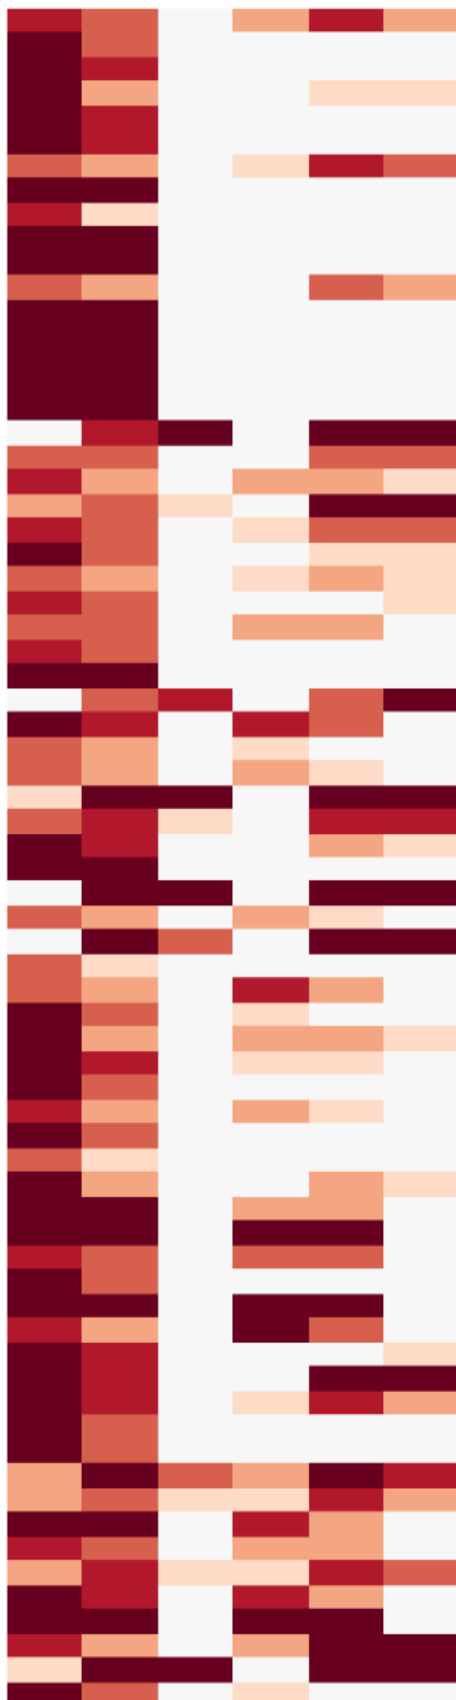

- GO:0044281 small molecule metabolic process(1567)
- GO:0010467 gene expression(1195)
- GO:0044267 cellular protein metabolic process(924)
- GO:0045944 positive regulation of transcription from RNA polymerase II promoter(740)
- GO:0016070 RNA metabolic process(627)
- GO:0006412 translation(625)
- GO:0043066 negative regulation of apoptotic process(587)
- GO:0016071 mRNA metabolic process(582)
- GO:0045893 positive regulation of transcription, DNA-dependent(563)
- GO:0006413 translational initiation(435)
- GO:0000184 nuclear-transcribed mRNA catabolic process, nonsense-mediated decay(421)
- GO:0008285 negative regulation of cell proliferation(415)
- GO:0006414 translational elongation(411)
- GO:0006614 SRP-dependent cotranslational protein targeting to membrane(404)
- GO:0019058 viral infectious cycle(383)
- GO:0006415 translational termination(376)
- GO:0019083 viral transcription(373)
- GO:0030198 extracellular matrix organization(288)
- GO:0001666 response to hypoxia(167)
- GO:0006629 lipid metabolic process(128)
- GO:0032496 response to lipopolysaccharide(122)
- GO:0045766 positive regulation of angiogenesis(101)
- GO:0071456 cellular response to hypoxia(96)
- GO:0001938 positive regulation of endothelial cell proliferation(77)
- GO:0050679 positive regulation of epithelial cell proliferation(62)
- GO:0008584 male gonad development(62)
- GO:0071363 cellular response to growth factor stimulus(47)
- GO:0035914 skeletal muscle cell differentiation(46)
- GO:0007566 embryo implantation(46)
- GO:0006309 apoptotic DNA fragmentation(44)
- GO:0042273 ribosomal large subunit biogenesis(39)
- GO:0050918 positive chemotaxis(38)
- GO:0010811 positive regulation of cell-substrate adhesion(38)
- GO:0043434 response to peptide hormone stimulus(37)
- GO:0048662 negative regulation of smooth muscle cell proliferation(36)
- GO:0071277 cellular response to calcium ion(34)
- GO:0030593 neutrophil chemotaxis(34)
- GO:0010595 positive regulation of endothelial cell migration(34)
- GO:0006953 acute-phase response(33)
- GO:0070373 negative regulation of ERK1 and ERK2 cascade(30)
- GO:0045648 positive regulation of erythrocyte differentiation(26)
- GO:0032870 cellular response to hormone stimulus(26)
- GO:0032570 response to progesterone stimulus(25)
- GO:0042327 positive regulation of phosphorylation(24)
- GO:0001975 response to amphetamine(24)
- GO:2001237 negative regulation of extrinsic apoptotic signaling pathway(22)
- GO:0033119 negative regulation of RNA splicing(22)
- GO:0043536 positive regulation of blood vessel endothelial cell migration(21)
- GO:0031668 cellular response to extracellular stimulus(21)
- GO:0006069 ethanol oxidation(20)
- GO:0019915 lipid storage(19)
- GO:0001659 temperature homeostasis(19)
- GO:0071542 dopaminergic neuron differentiation(13)
- GO:0050995 negative regulation of lipid catabolic process(13)
- GO:0030194 positive regulation of blood coagulation(13)
- GO:0014067 negative regulation of phosphatidylinositol 3-kinase cascade(13)
- GO:0051602 response to electrical stimulus(12)
- GO:0051412 response to corticosterone stimulus(12)
- GO:0042551 neuron maturation(12)
- GO:0060395 SMAD protein signal transduction(11)
- GO:0048545 response to steroid hormone stimulus(11)
- GO:0006693 prostaglandin metabolic process(11)
- GO:0006402 mRNA catabolic process(11)
- GO:0006288 base-excision repair, DNA ligation(11)
- GO:2000353 positive regulation of endothelial cell apoptotic process(10)
- GO:1900118 negative regulation of execution phase of apoptosis(10)
- GO:0035634 response to stilbenoid(10)
- GO:0034383 low-density lipoprotein particle clearance(10)
- GO:0033280 response to vitamin D(10)
- GO:0009416 response to light stimulus(10)

Down Non-dir. Up Down Non-dir. Up

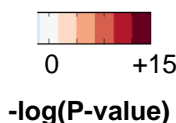

Before BS-Lean

After BS-Lean

GO BP Terms in SAT

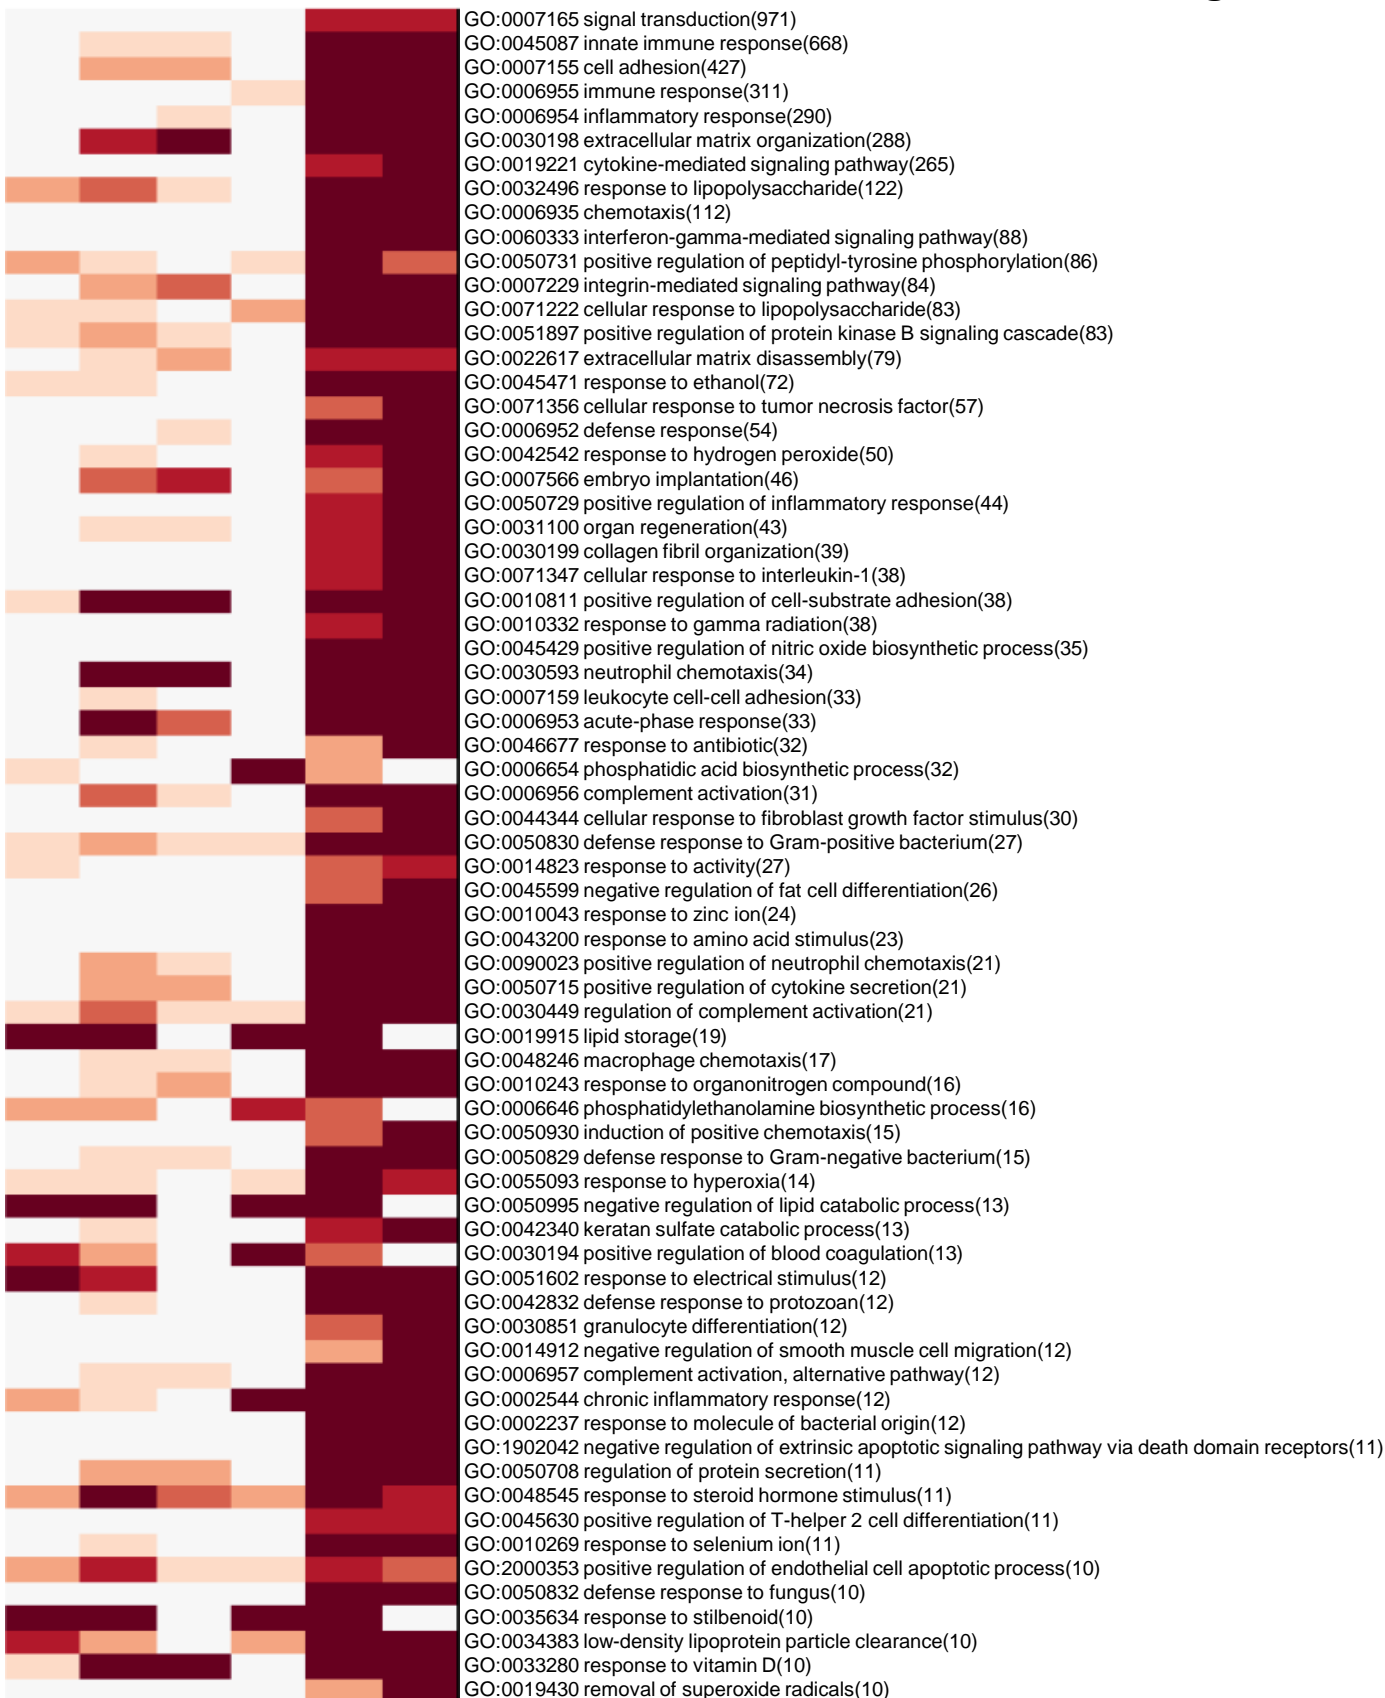

Down Non-dir. Up Down Non-dir. Up

0 +15

-log(P-value)

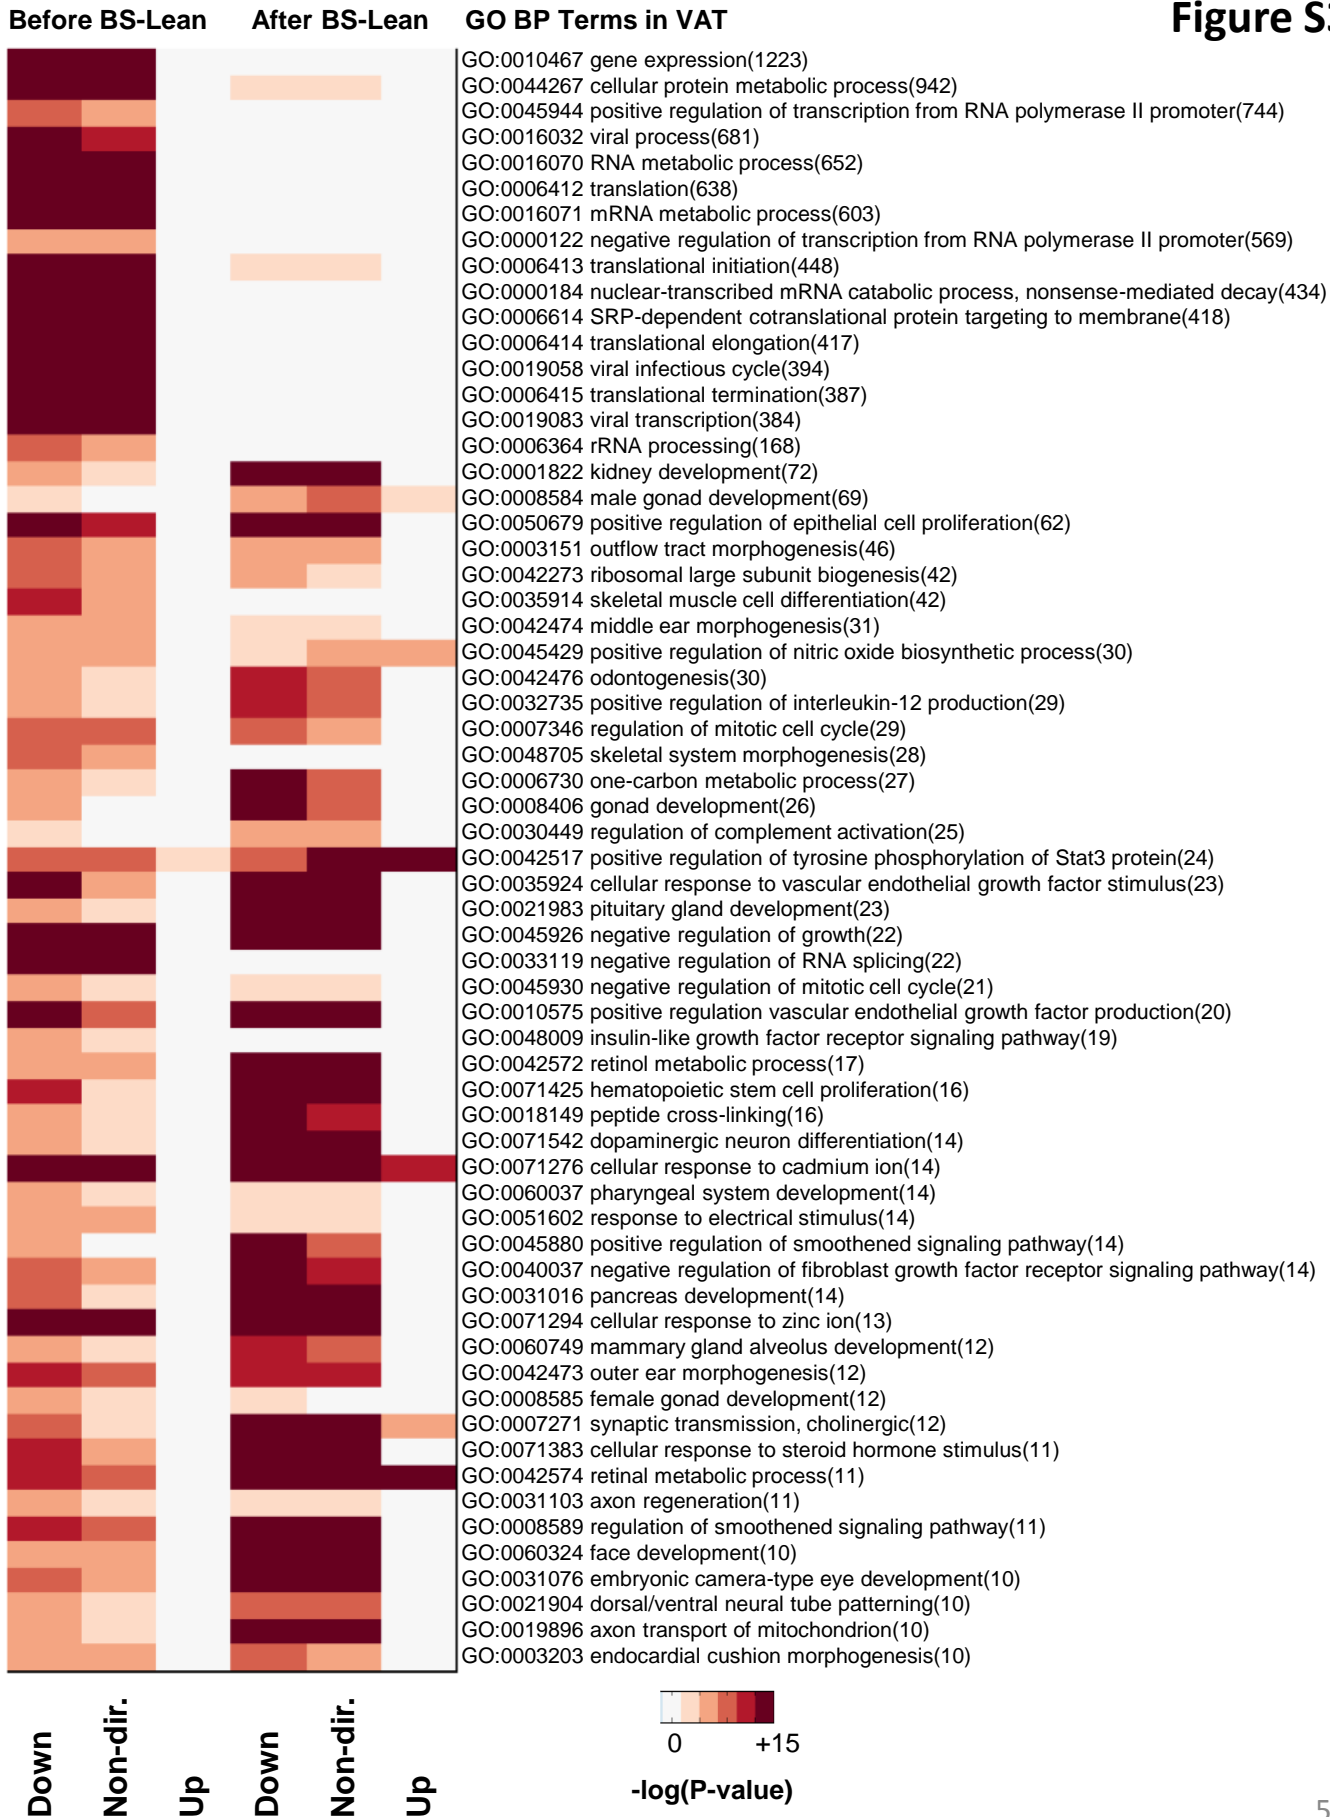

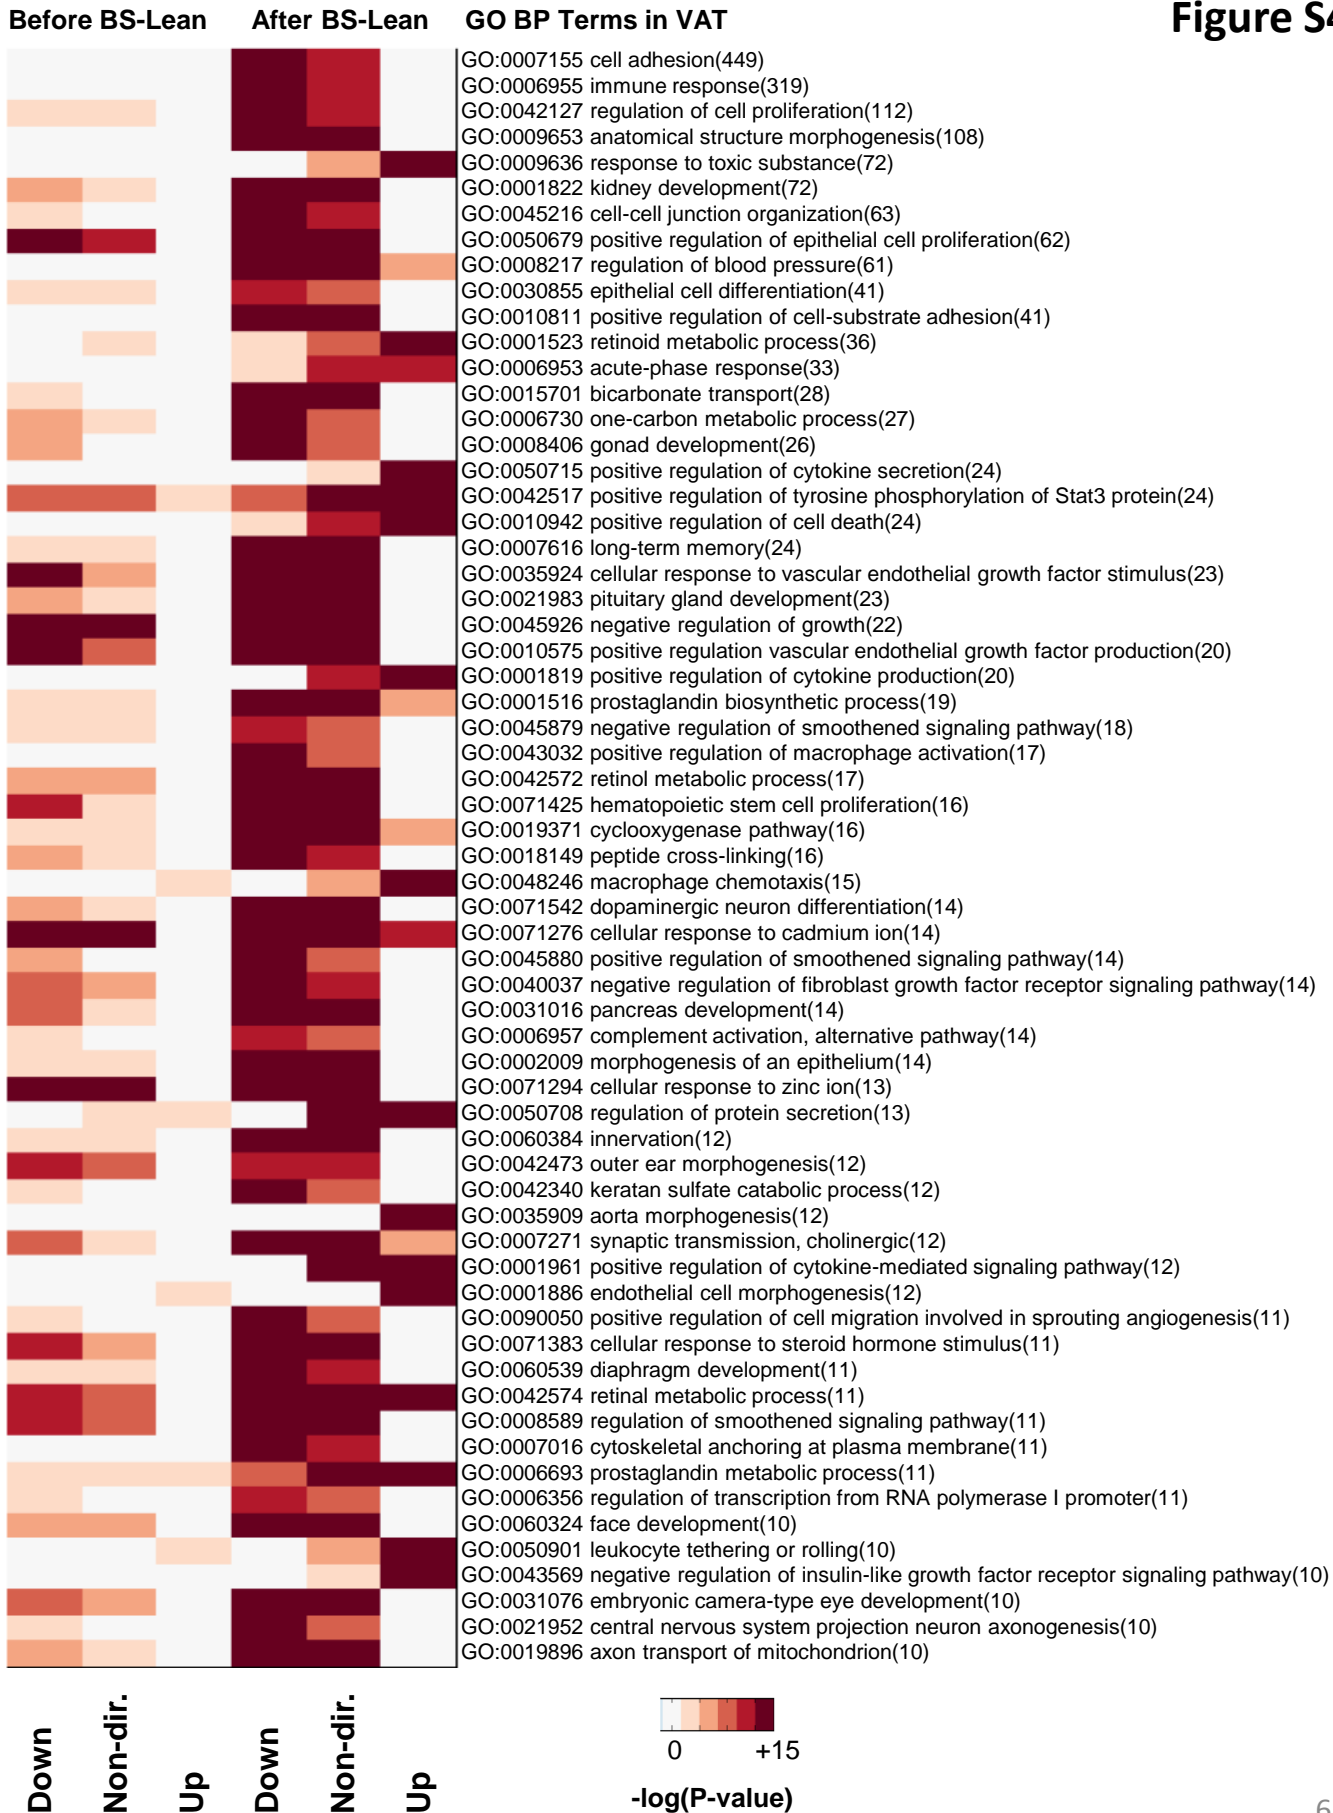

A.

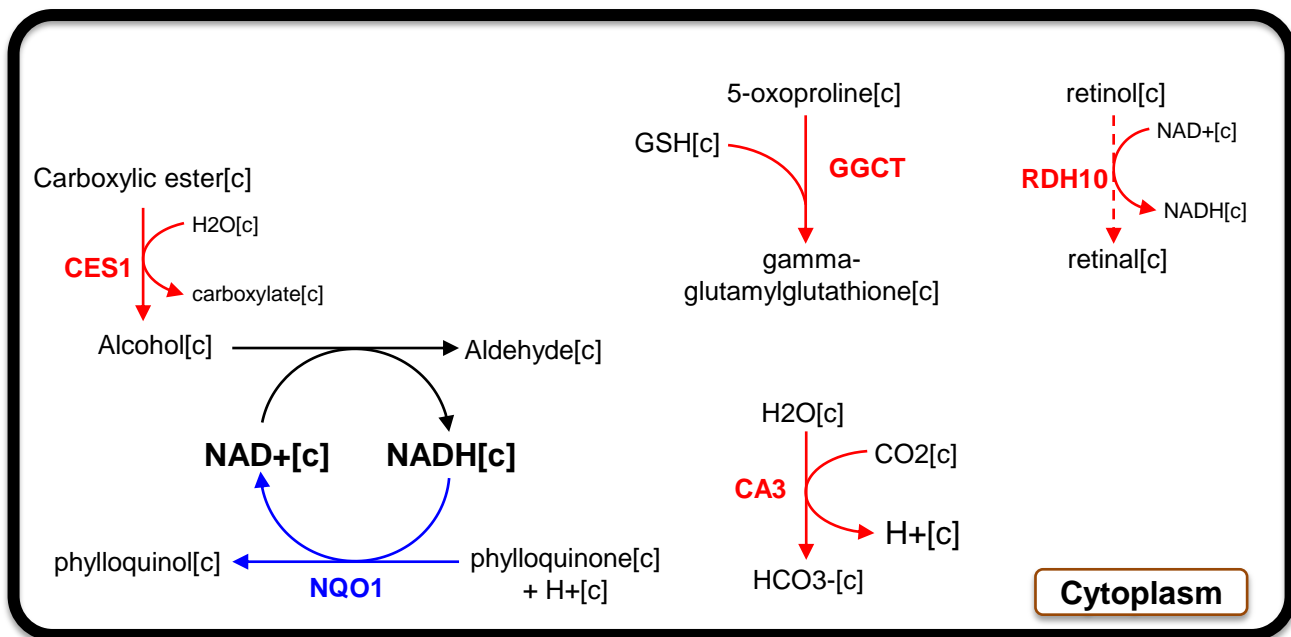

B.

Subcutaneous Adipose Tissue

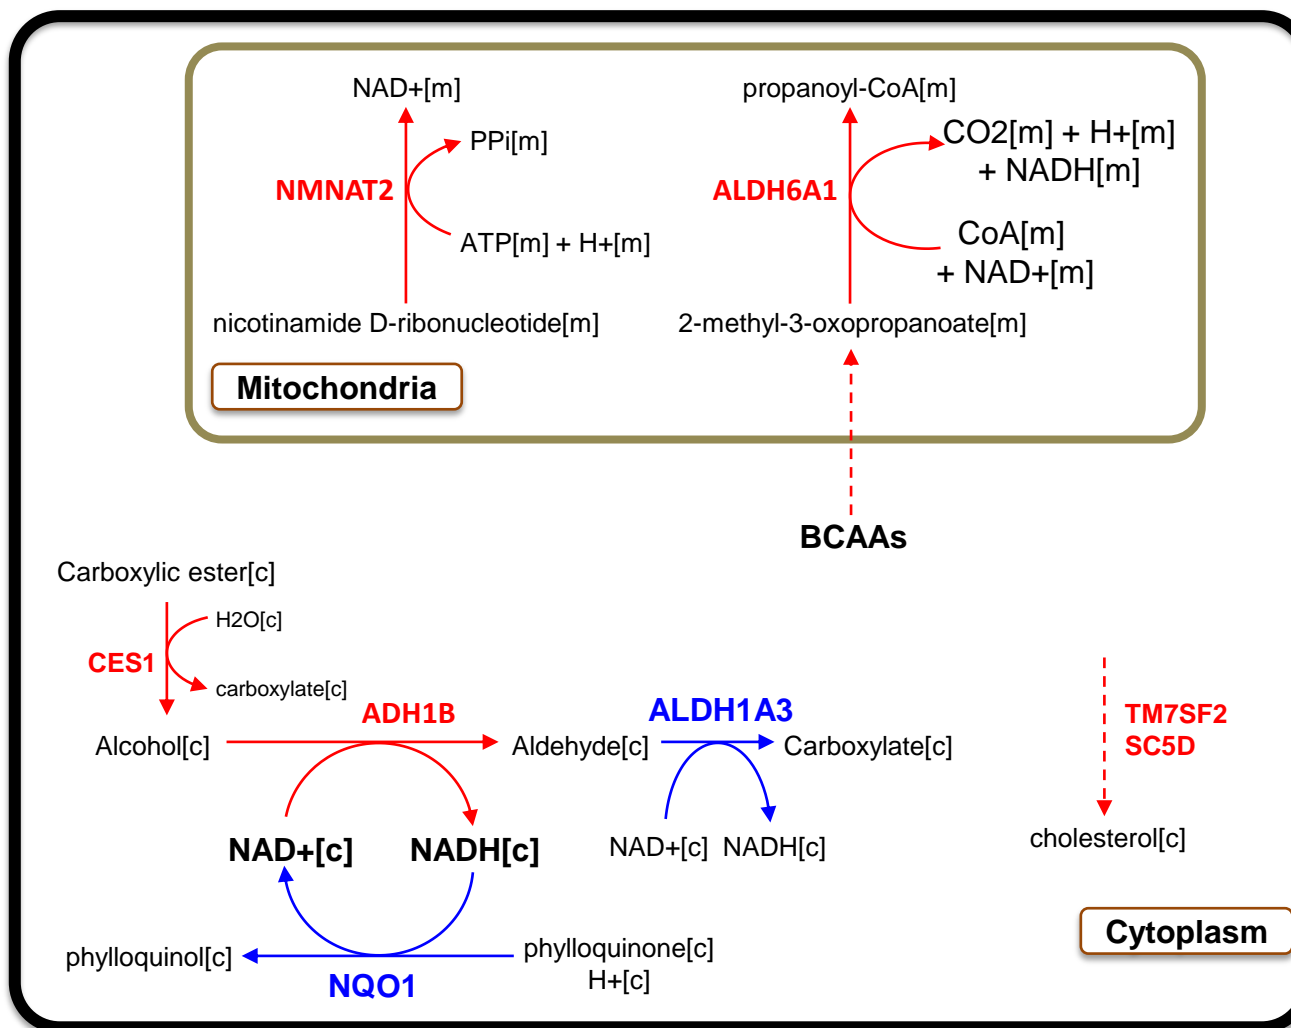

Supplement: srep14841-s1.pdf [file srep14841-s1.pdf]
